# Supplementary material for: Air-grown hybrid copper(i) halide single crystals: structural transformations and ultraviolet-pumped photoluminescence applications
Source: Royal Society of Chemistry journal article supplement (doi:10.1039/d1ma01055g), 2022-01-01
Supplement: d1ma01055g1.pdf [file d1ma01055g1.pdf]

## **Electronic Supplementary Information for:**

### **Air-Grown Hybrid Copper (I) Halide Single Crystals: Structural Transformations and Ultraviolet-Pumped Photoluminescence Applications**

Zhexin Song, <sup>a</sup>Binyin Yu, <sup>a</sup>Lingqiang Meng, <sup>\*b</sup>Guokui Liu<sup>\*c</sup> and Yangyang Dang <sup>\*a</sup>

<sup>a</sup>School of Physics and Physical Engineering, Shandong Provincial Key Laboratory of Laser

Polarization and Information Technology, Qufu Normal University, 273165, Qufu, P. R. China

<sup>b</sup>Materials Interfaces Center, Shenzhen Institutes of Advanced Technology, Chinese Academy of  
Sciences, Shenzhen 518055, P. R. China

<sup>c</sup>School of Chemistry and Chemical Engineering, Linyi University, Linyi 276000, P. R. China

\*Corresponding authors

dyy@qfnu.edu.cn (Y. D.);

lq.meng@siat.ac.cn (L. M.)

liuguokuihappy@163.com (G. L.).

**Fig. S1.** Photos of  $\text{Gua}_6\text{Cu}_4\text{I}_{10}$  single crystal at sunlight (A), and UV-254 nm (B) condition. (C) Powder and single-crystal X-ray diffraction (PXRD) patterns of  $\text{Gua}_6\text{Cu}_4\text{I}_{10}$ . PLE and PL spectra of  $\text{Gua}_6\text{Cu}_4\text{I}_{10}$  single crystal (D).

**Fig. S2.** Core level XPS spectra for (A) wide scan of  $\text{Gua}_3\text{Cu}_2\text{I}_5$  single crystals, (B) C 1s, (C) N 1s, (D) I 3d, and (E) Cu 2p, fitted with peaks having an 80% Gaussian and 20% Lorentzian peak shape after applying background subtraction with Shirley function. Core level XPS spectra for (F) wide scan of  $\text{Gua}_4\text{Cu}_4\text{Br}_8$  single crystals, (G) C 1s, (H) N 1s, (I) Cu 2p, and (J) Br 3d, fitted with peaks having an 80% Gaussian and 20% Lorentzian peak shape after applying background subtraction with Shirley function.

**Fig. S3.** Spatial distributions of VBM (A) and CBM (B) of  $\text{Gua}_3\text{Cu}_2\text{I}_5$  at  $\Gamma$  point calculated by DFT.

**Fig. S4.** TGA/DSC diagrams of  $\text{Gua}_4\text{Cu}_4\text{Br}_8$  and  $\text{Gua}_3\text{Cu}_2\text{I}_5$ .

**Fig. S5.** Photos of  $\text{Gua}_3\text{Cu}_2\text{I}_5$  at room temperature and 100 °C under the irradiation of UV-254nm

**Fig. S6.** Absolute PLQY of  $\text{Gua}_3\text{Cu}_2\text{I}_5$  powders based on  $\text{BaSO}_4$  as standard material

**Fig. S7.** PL decay lifetime of  $\text{Gua}_6\text{Cu}_4\text{I}_{10}$  powders.

**Fig. S8.** Absolute PLQY of  $\text{Gua}_6\text{Cu}_4\text{I}_{10}$  powders based on  $\text{BaSO}_4$  standard material

**Table S1.** Crystal structure data for  $\text{Gua}_4\text{Cu}_4\text{Br}_8$ ,  $\text{Gua}_3\text{Cu}_2\text{I}_5$  and  $\text{Gua}_6\text{Cu}_4\text{I}_{10}$ .

**Movie S1.** Video of UV-pumped LEDs based on  $\text{Gua}_3\text{Cu}_2\text{I}_5$  single crystals.

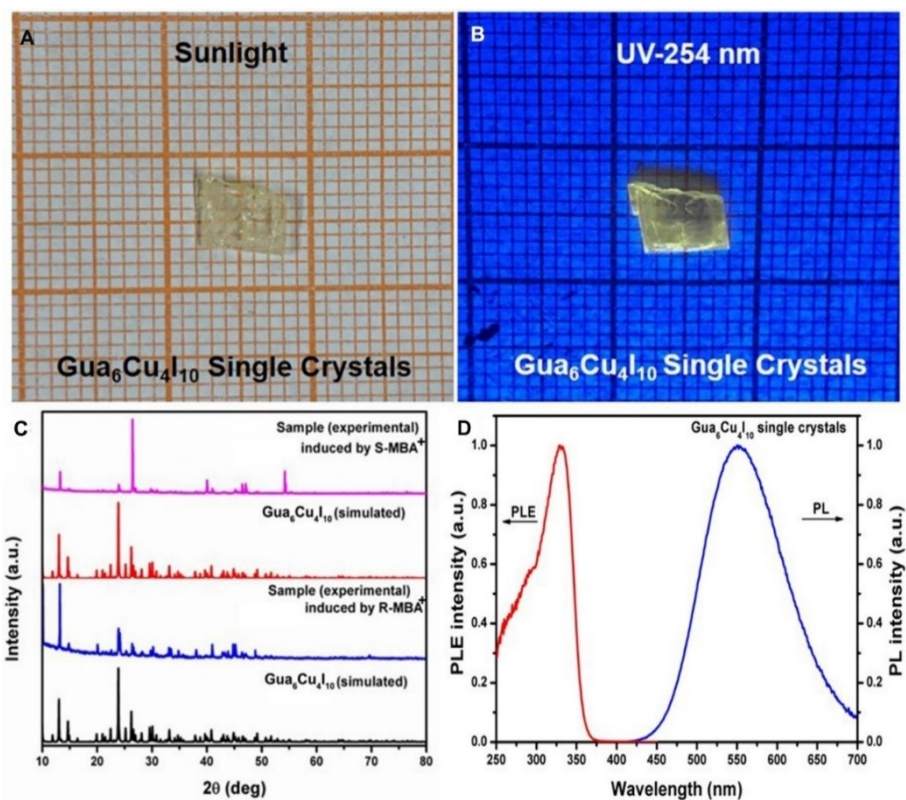

**Fig. S1.** Photos of  $\text{Gua}_6\text{Cu}_4\text{I}_{10}$  single crystal at sunlight (A), and UV-254 nm (B) condition. (C) Powder and single-crystal X-ray diffraction (PXRD) patterns of  $\text{Gua}_6\text{Cu}_4\text{I}_{10}$ . PLE and PL spectra of  $\text{Gua}_6\text{Cu}_4\text{I}_{10}$  single crystal (D).

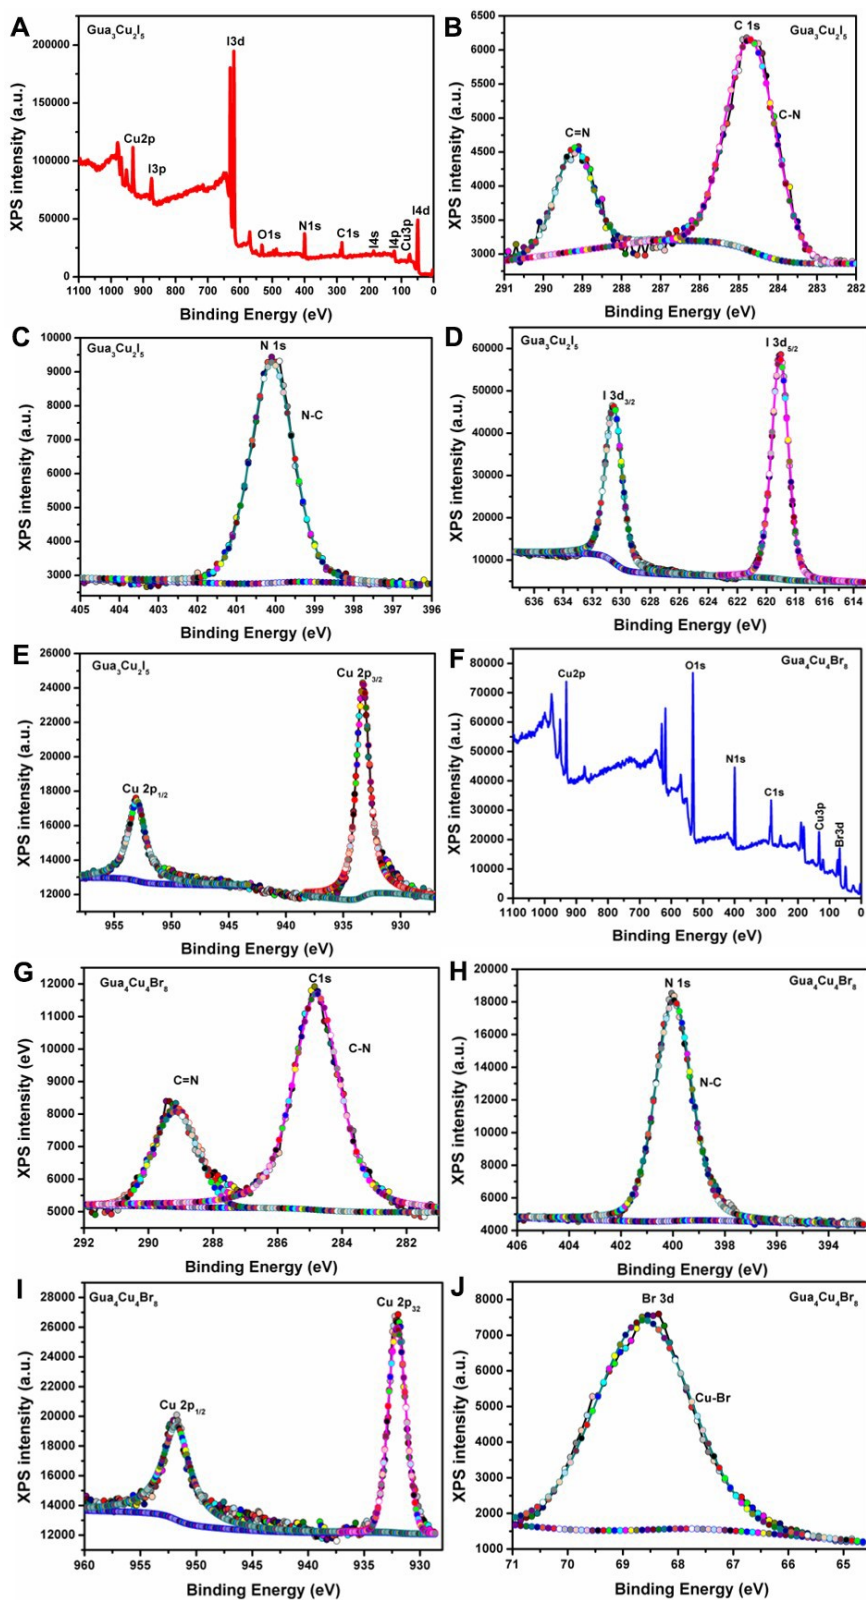

**Fig. S2.** Core level XPS spectra for (A) wide scan of  $\text{Gua}_3\text{Cu}_2\text{I}_5$  single crystals, (B) C 1s, (C) N 1s, (D) I 3d, and (E) Cu 2p, fitted with peaks having an 80% Gaussian and 20% Lorentzian peak shape after applying background subtraction with Shirley function. Core level XPS spectra for (F) wide scan of  $\text{Gua}_4\text{Cu}_4\text{Br}_8$  single crystals, (G) C 1s, (H) N 1s, (I) Cu 2p, and (J) Br 3d, fitted with peaks having an 80% Gaussian and 20% Lorentzian peak shape after applying background subtraction with Shirley function.

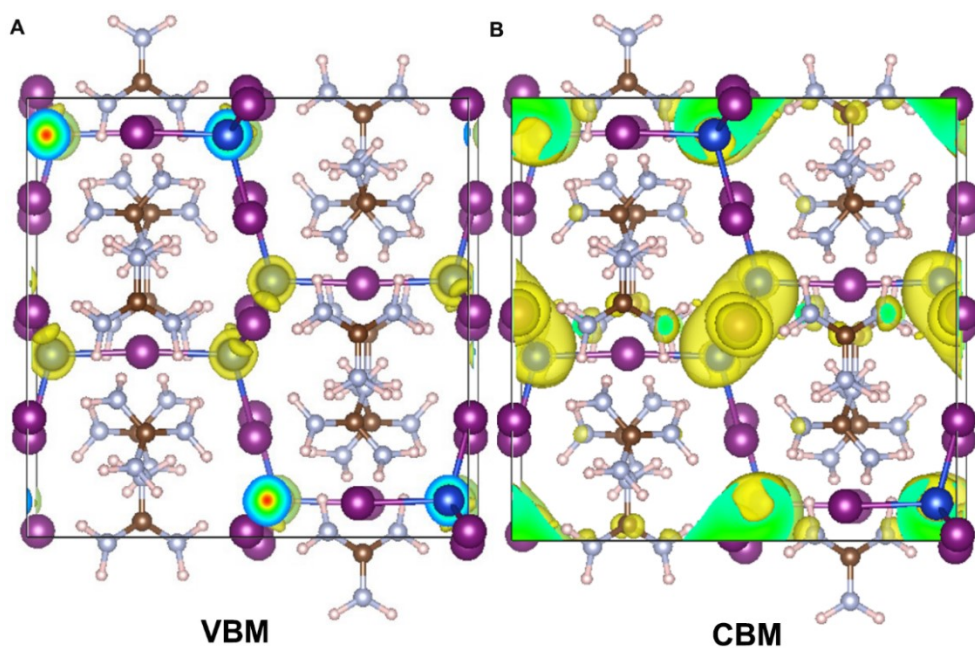

Fig. S3. Spatial distributions of VBM (A) and CBM (B) of  $\text{Gua}_3\text{Cu}_2\text{I}_5$  at  $\Gamma$  point calculated by DFT.

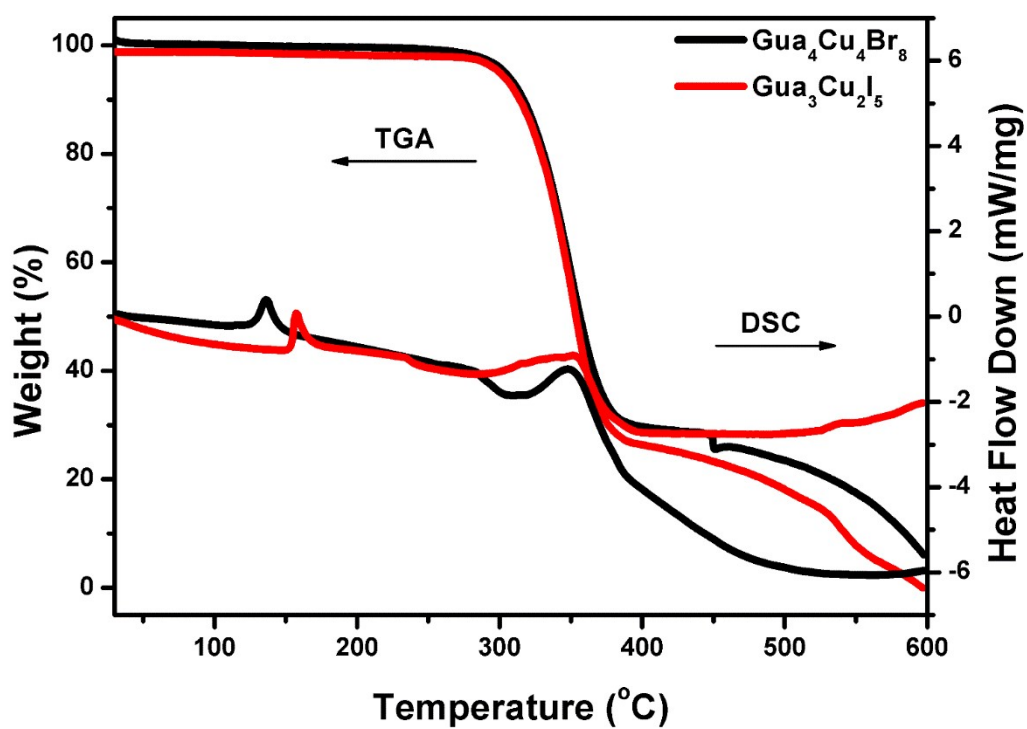

Fig. S4. TGA/DSC diagrams of  $\text{Gua}_4\text{Cu}_4\text{Br}_8$  and  $\text{Gua}_3\text{Cu}_2\text{I}_5$ .

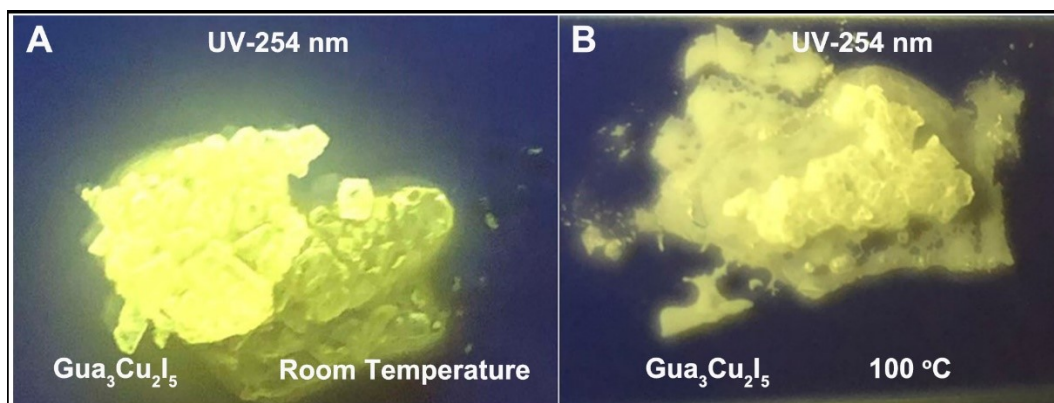

**Fig. S5.** Photos of  $\text{Gua}_3\text{Cu}_2\text{I}_5$  at room temperature and 100 °C under the irradiation of UV-254nm

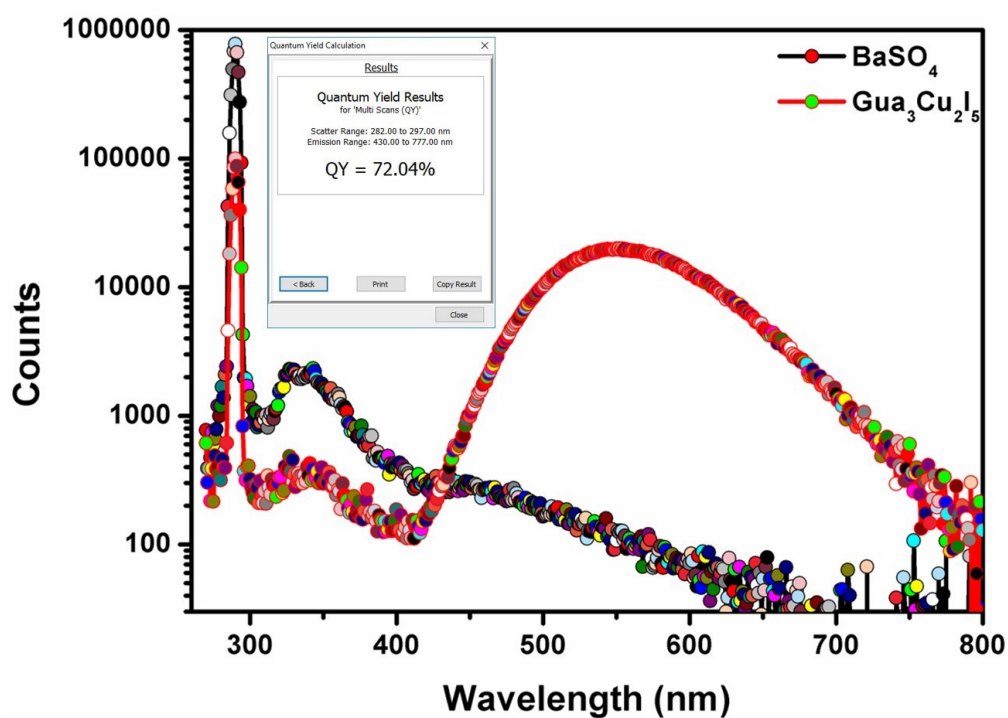

**Fig. S6.** Absolute PLQY of  $\text{Gua}_3\text{Cu}_2\text{I}_5$  powders based on  $\text{BaSO}_4$  standard material

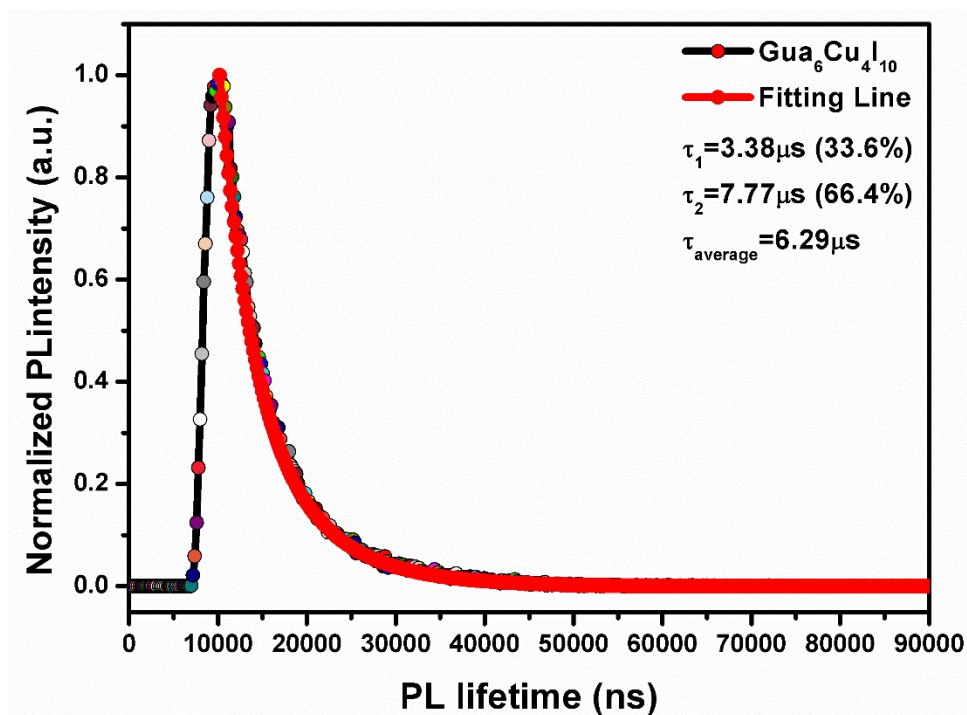

Fig. S7. PL decay lifetime of  $\text{Gua}_6\text{Cu}_4\text{I}_{10}$  powders.

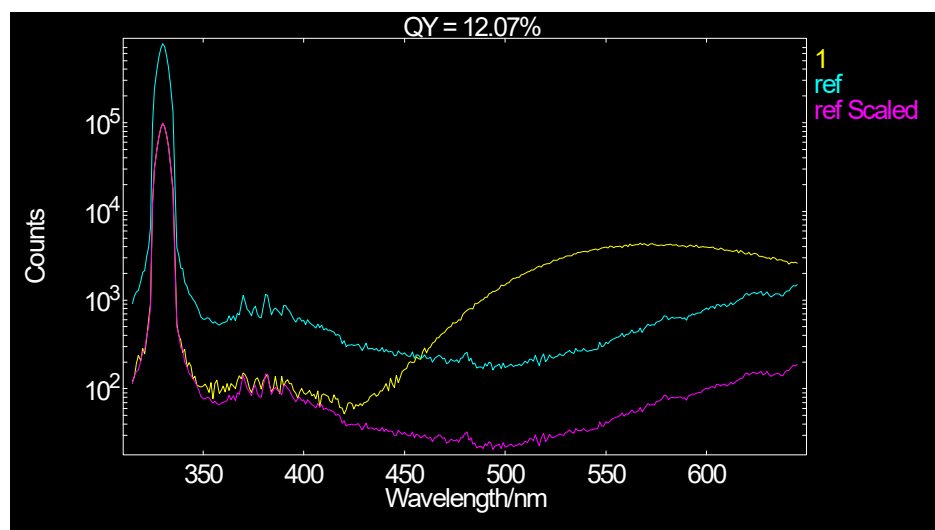

Fig. S8. Absolute PLQY of  $\text{Gua}_6\text{Cu}_4\text{I}_{10}$  powders based on  $\text{BaSO}_4$  standard material.

**Table S1.** Crystal structure data for Gua<sub>4</sub>Cu<sub>4</sub>Br<sub>8</sub>, Gua<sub>3</sub>Cu<sub>2</sub>I<sub>5</sub> and Gua<sub>6</sub>Cu<sub>4</sub>I<sub>10</sub>.

| Identification code                | <b>Gua<sub>4</sub>Cu<sub>4</sub>Br<sub>8</sub></b>                             | <b>Gua<sub>3</sub>Cu<sub>2</sub>I<sub>5</sub></b>                            | <b>Gua<sub>6</sub>Cu<sub>4</sub>I<sub>10</sub></b>             |
|------------------------------------|--------------------------------------------------------------------------------|------------------------------------------------------------------------------|----------------------------------------------------------------|
| Empirical formula                  | C <sub>4</sub> H <sub>24</sub> Br <sub>8</sub> Cu <sub>4</sub> N <sub>12</sub> | C <sub>3</sub> H <sub>18</sub> Cu <sub>2</sub> I <sub>5</sub> N <sub>9</sub> | C <sub>6</sub> Cu <sub>4</sub> I <sub>10</sub> N <sub>18</sub> |
| Formula weight/g·mol <sup>-1</sup> | 1133.79                                                                        | 941.84                                                                       | 1847.40                                                        |
| Temperature/K                      | 293(2)K                                                                        | 293(2)K                                                                      | 293(2)K                                                        |
| Wavelength/Å                       |                                                                                | 0.71073                                                                      |                                                                |
| Crystal color                      | Colorless                                                                      | Colorless                                                                    | Colorless                                                      |
| Crystal system                     | Monoclinic                                                                     | Monoclinic                                                                   | Orthorhombic                                                   |
| Space group                        | <i>P2<sub>1</sub>/n</i> (no.14)                                                | <i>C2/c</i> (no.15)                                                          | <i>Cmc2<sub>1</sub></i> (no.36)                                |
| a/Å                                | 8.0772(2)                                                                      | 12.0317(9)                                                                   | 12.072(3)                                                      |
| b/Å                                | 11.5386(4)                                                                     | 13.2491(10)                                                                  | 13.215(3)                                                      |
| c/Å                                | 29.4561(11)                                                                    | 13.5695(10)                                                                  | 13.581(3)                                                      |
| α/°                                | 90.00                                                                          | 90.00                                                                        | 90.00                                                          |
| β/°                                | 96.1640(10)                                                                    | 90.985(7)                                                                    | 90.00                                                          |
| γ/°                                | 90.00                                                                          | 90.00                                                                        | 90.00                                                          |
| Volume/Å <sup>3</sup>              | 2729.42(15)                                                                    | 2162.8(3)                                                                    | 2166.6(9)                                                      |
| Crystal size (mm <sup>3</sup> )    | 0.15 × 0.12 × 0.1                                                              | 0.15 × 0.12 × 0.1                                                            | 0.12×0.1×0.1                                                   |
| Z                                  | 4                                                                              | 4                                                                            | 2                                                              |
| Density/g·cm <sup>-3</sup>         | 2.759                                                                          | 2.893                                                                        | 2.832                                                          |
| μ(mm <sup>-1</sup> )               | 14.804                                                                         | 9.105                                                                        | 9.087                                                          |
| F (000)                            | 2112.0                                                                         | 1688.0                                                                       | 1616.0                                                         |
| GOF on F <sup>2</sup>              | 1.079                                                                          | 1.111                                                                        | 1.087                                                          |
| Absolute Flack Factor              | ---                                                                            | ---                                                                          | 0.3(3)                                                         |



| Absorption correction                         | Semi-empirical from equivalents             |                |                |
|-----------------------------------------------|---------------------------------------------|----------------|----------------|
| Refinement method                             | Full-matrix least-squares on F <sup>2</sup> |                |                |
| Data / restraints / parameters                | 6789/0/255                                  | 2204/0/91      | 2789/64/105    |
| R <sub>1</sub> , wR <sub>2</sub> [I > 2σ (I)] | 0.0397, 0.0855                              | 0.0638, 0.1954 | 0.0593, 0.1295 |
| R <sub>2</sub> , wR <sub>2</sub> (all data)   | 0.0670, 0.0970                              | 0.0716, 0.1997 | 0.0797, 0.1416 |
| Min/Max Δρ /eÅ <sup>-3</sup>                  | -1.35/0.78                                  | -2.48/3.17     | -2.84/2.74     |
| CCDC                                          | <b>2113135</b>                              | <b>2113134</b> | <b>2113136</b> |
